# Supplementary material for: New Intracellular Peptide Derived from Hemoglobin Alpha Chain Induces Glucose Uptake and Reduces Blood Glycemia
Source: MDPI journal article supplement (doi:10.3390/pharmaceutics13122175), 2021-12-16
Supplement: s1 [file s1]

# Supplementary Materials: New Intracellular Peptide Derived from Hemoglobin Alpha Chain Induces Glucose Uptake and Reduces Blood Glycemia

Renée N. O. Silva, Ricardo P. Llanos, Rosangela A. S. Eichler, Thiago B. Oliveira, Fábio C. Gozzo, William T. Festuccia and Emer S. Ferro

**Table S1.** Primers sequences.

| Gene                                                               | Sequence                                                  | Amplicon (bp) | Accession number |
|--------------------------------------------------------------------|-----------------------------------------------------------|---------------|------------------|
| Peroxisome Proliferator Activated Receptor Gamma (PPAR- $\gamma$ ) | Fwd: CATAAAGTCCTTCCCGCTGA<br>Rev: GAAACTGGCACCCCTT-GAAAA  | 102           | NM_001127330.2   |
| Peroxisome Proliferator Activated Receptor Alpha (PPAR- $\alpha$ ) | Fwd: TGCAATTCGCTTTGGAA-GAA<br>Rev: CTTGCCCAGAGATTT-GAGGT  | 118           | NM_011144.6      |
| Aldolase A, Fructose-bisphosphate (AldoA)                          | Fwd: GAGCTGTCTGACATCGCTCA<br>Rev: TCTCGTGGAAGAGGATCACC    | 204           | NM_001177307.1   |
| Lipoprotein Lipase (LPL)                                           | Fwd: GTCTGGCTGACACTG-GACAAA<br>Rev: CCCAC-TTTCAAACACCCAAA | 122           | NM_008509.2      |
| Phosphoglycerate Mutase 2 (Pgam2)                                  | Fwd: TGGAATGAGGAGATCG-CACC<br>Rev: ATTCCAGTGGG-CAGGTTGAG  | 143           | NM_018870.3      |
| Myosin, Light Chain 1 (MYL-1)                                      | Fwd: GGAGGCATTTCTCCTGTTTG<br>Rev: CCTGGTCCTTGTGTTGGAG     | 133           | NM_021285.3      |
| Small Muscle Protein X-linked (SPMXc)                              | Fwd: CAGCCTCCCAGAAGGAAAG<br>Rev: ACTGTTACCTTTGGGGACA      | 113           | NM_001252591.2   |
| cAMP Responsive Element Binding Protein 1 (Creb1)                  | Fwd: GGTGCCAAGGATTGAA-GAAG<br>Rev: GTACCCCATCCGTAC-CATTG  | 110           | NM_133828.2      |
| Cytochrome c Oxidase Subunit IV Isoform 1 (COX4i1)                 | Fwd: CGCTGAAGGAGAAGGA-GAAG<br>Rev: GGATGGGGCCATACACATAG   | 77            | NM_009941.3      |
| Troponin I, skeletal, fast 2 (TNNT2)                               | Fwd: TGCAAACTG-CATGCGAA<br>Rev: TTGAACTT-GCCCCTCAGGTC     | 131           | NM_009405.3      |
| Troponin I, skeletal, fast 3 (TNNT3)                               | Fwd: CCCCAGCCTTTCTCAGACTC                                 | 106           | NM_001163664.1   |

|                                                       |                                                                    |     |                |
|-------------------------------------------------------|--------------------------------------------------------------------|-----|----------------|
|                                                       | Rev:<br>TTGGGCCTCCTCTTCCTCTT                                       |     |                |
| Insulin-like Growth Factor 1<br>(IGF1)                | Fwd: TGTACTTCAGAA-<br>GCGATGGGG<br>Rev: AGAGGTGTGAAGAC-<br>GACATGA | 112 | NM_010512.5    |
| Solute Carrier Family 2 - Slc2a4<br>(GLUT4)           | Fwd:<br>CCAACAGCTCTCAGGCATCA<br>Rev: CAGCTCCTATGGTGGCG-<br>TAG     | 98  | NM_001359114.1 |
| Glyceraldehyde 3-phosphate de-<br>hydrogenase (GAPDH) | Fwd: GTGCAG-<br>TGCCAGCCTCGTCC<br>Rev: CAGGCGCCCAATAC-<br>GGCCAA   | 75  | BC_085275      |

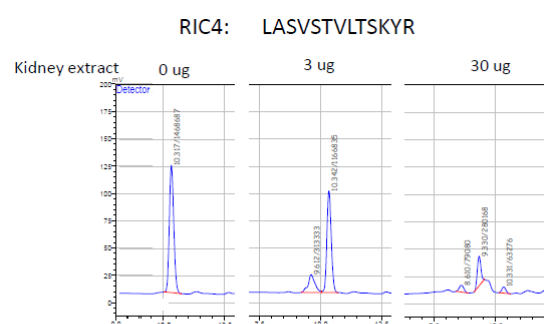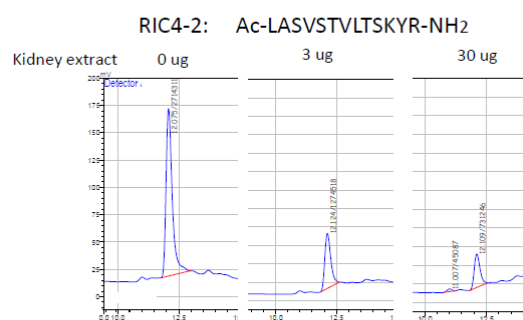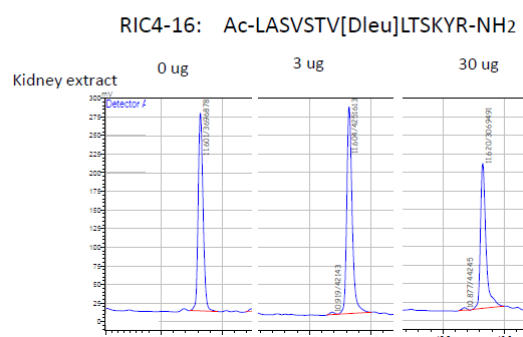

**Figure S1.** Typical experiments to evaluate the enzymatic stability of Ric4 and derivatives on kidney tissue extracts. In order to determine if the peptides investigated herein were substrates of tissue peptidases, 50  $\mu$ M of each peptide was individually incubated for 20 min in the presence of increasing crude kidney tissue extracts (0  $\mu$ g, 3  $\mu$ g or 30  $\mu$ g, as indicated), in a final volume of 250  $\mu$ l of 0,025 M Tris-HCl, containing 0.125 M NaCl (TBS). Peptide hydrolyses were analyzed by reverse phase liquid chromatography (HPLC) using a C18  $\mu$ Bond-pak column (4.6  $\times$  250 mm; Millipore Corp.) with a linear gradient of 5–65% acetonitrile in 0.1 % TFA for 20 min at a flow rate of 1 mL/min,

and absorbance monitored at a wavelength of 214 nm, as previously described [8,36,37]. Cleaved peptide bonds were identified by mass spectrometry sequencing after isolating the cleavage fragments manually after HPLC (data not shown). Note the greater stability of the Ric4-derivative Ac-LASVSTV[DLeu]TSKYR-NH<sub>2</sub> (Ric4-16) compared to Ac-LASVSTVLTSKYR-NH<sub>2</sub>; Ric4-2 (Ric4-2) or LASVSTVLTSKYR (Ric4).
